# Supplementary material for: Urban-rural patterns and driving factors of particulate matter pollution decrease in eastern china
Source: Copernicus journal article supplement (doi:10.5194/egusphere-2025-2194), 2025-06-06
Supplement: Supplementary file 1 [file egusphere-2025-2194-supplement.pdf]

1 Supplementary Materials for:

2 **Urban-rural patterns and driving factors of particulate**  
3 **matter pollution decrease in eastern china**

4  
5 **Zhihao Song et al.**

6  
7 \*Corresponding to: Bin Chen ([chenbin@lzu.edu.cn](mailto:chenbin@lzu.edu.cn))

8  
9 This PDF file includes:Figure S1 to S10

10

11

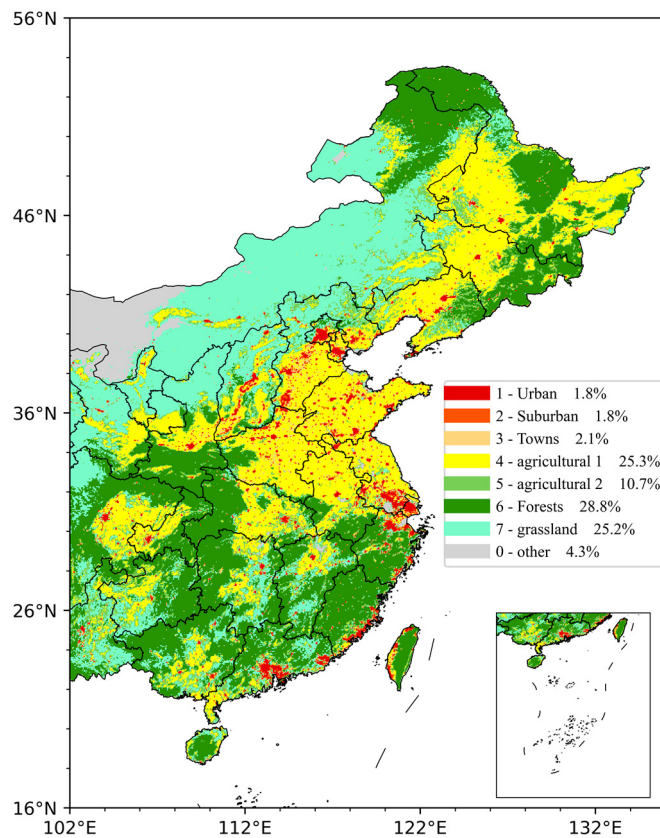

12

13 **Figure S1 Adjusted land cover types**

14

15

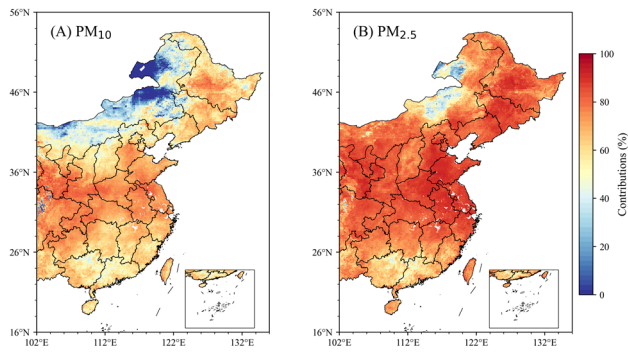

**Figure S2. The explanatory power of the model in the calculation of driving factors.**

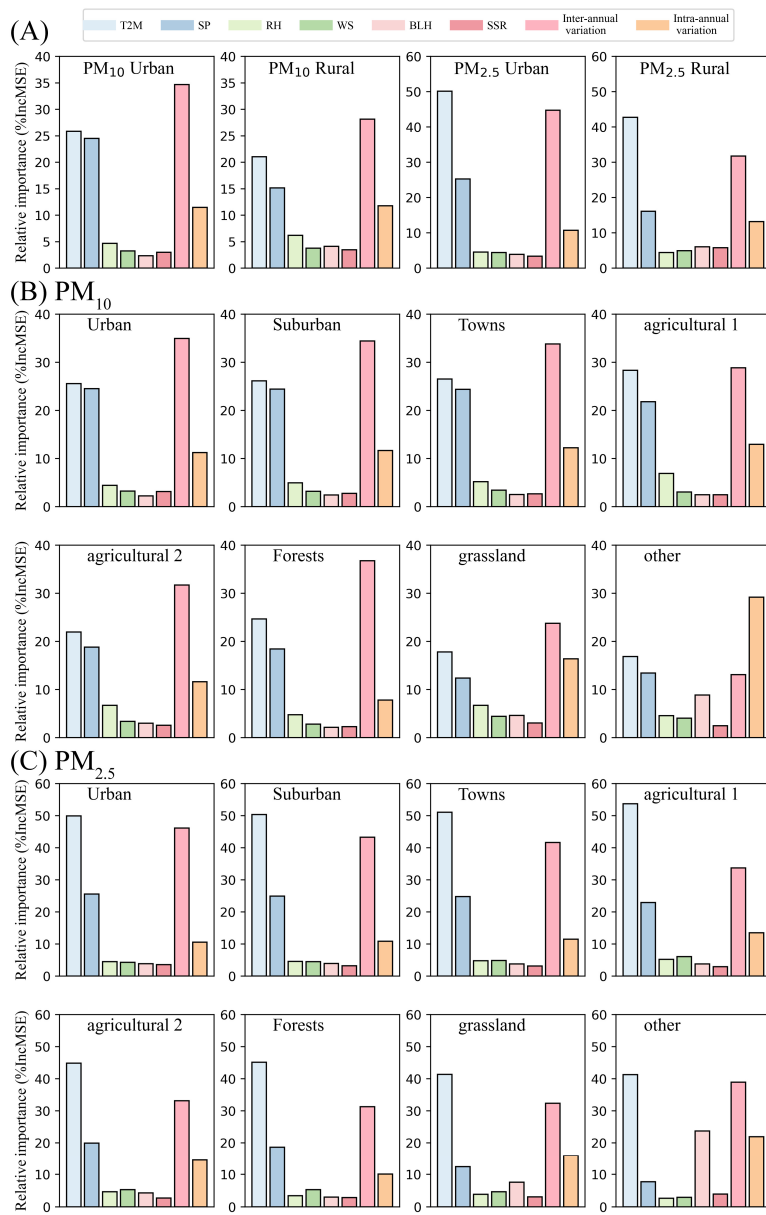

**Figure S3. The urban and rural distribution of the relative importance of PM2.5 and PM10**

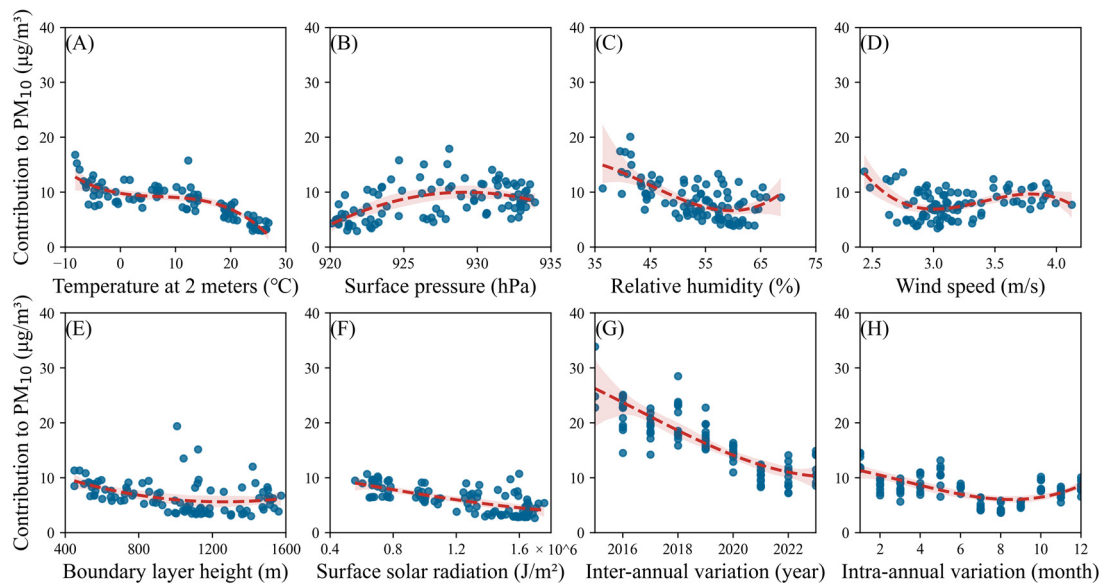

**Figure S4. Scatter plot of the relative contributions of various variables to PM10**

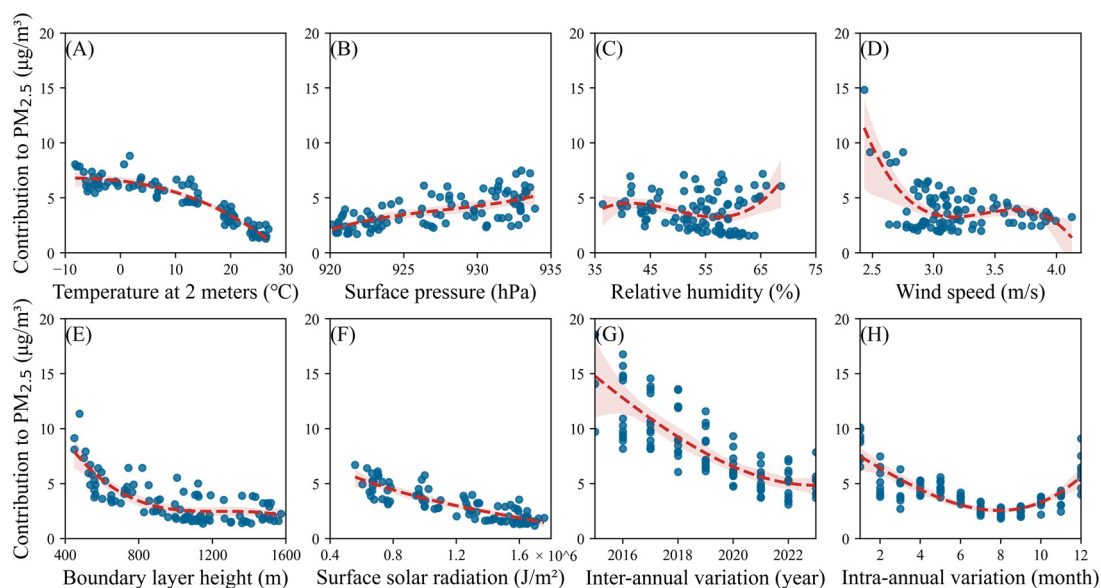

**Figure S5. Scatter plot of the relative contributions of various variables to PM2.5.**

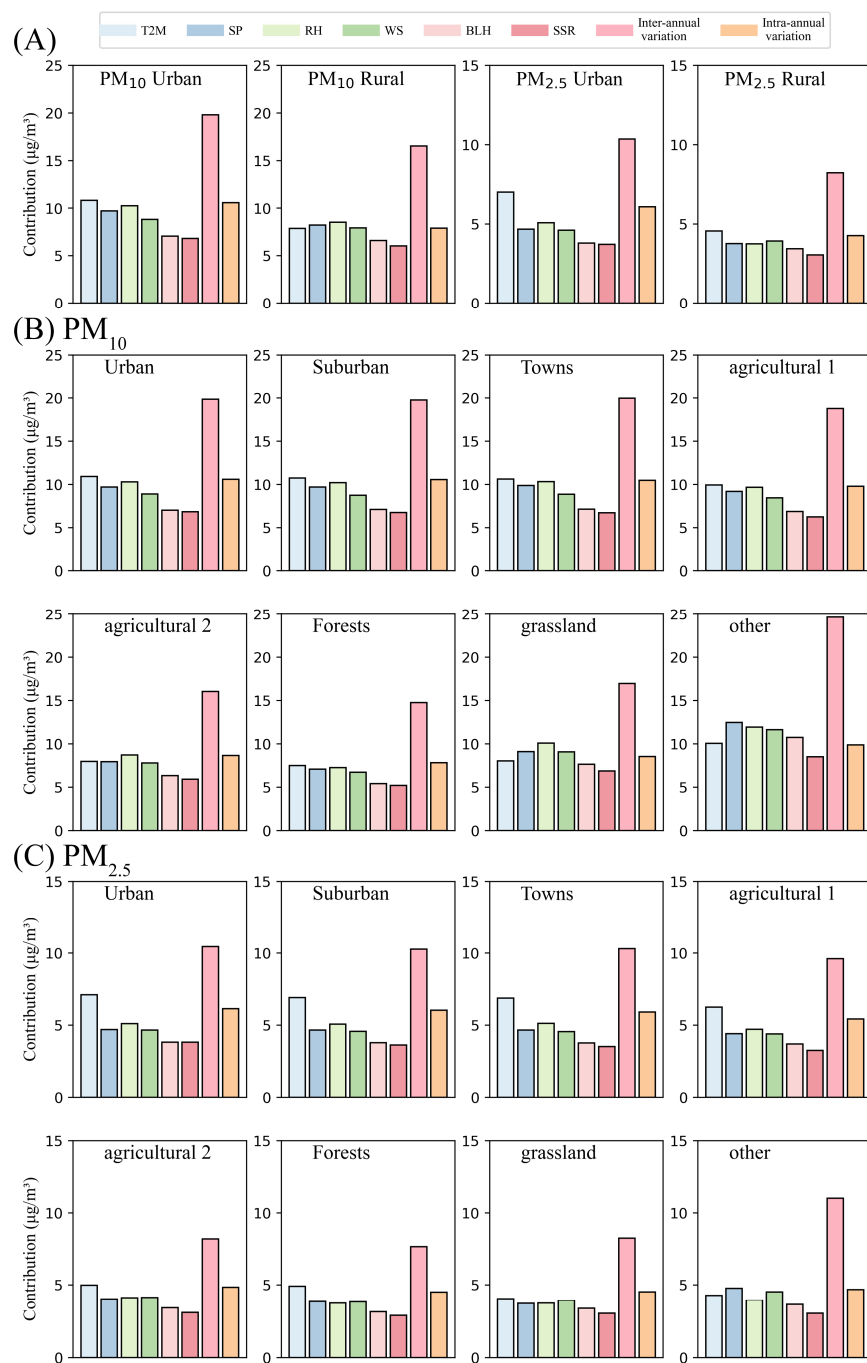

**Figure S6. Distribution of the relative contribution of each variable to PM<sub>2.5</sub> and PM<sub>10</sub> in urban and rural areas.**

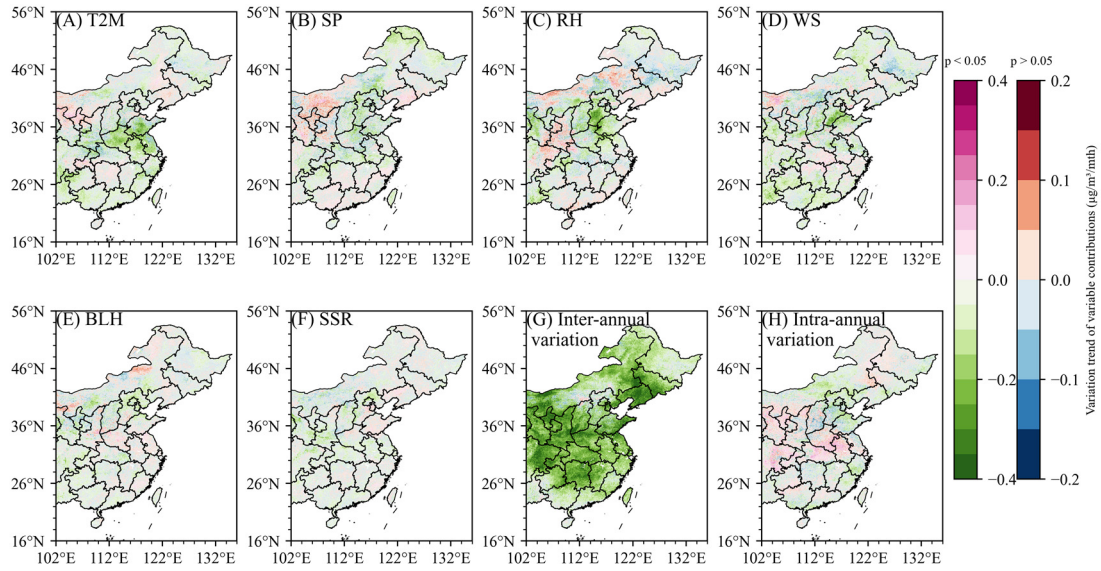

**Figure S7. Trends in the relative contributions of various variables to PM10.**

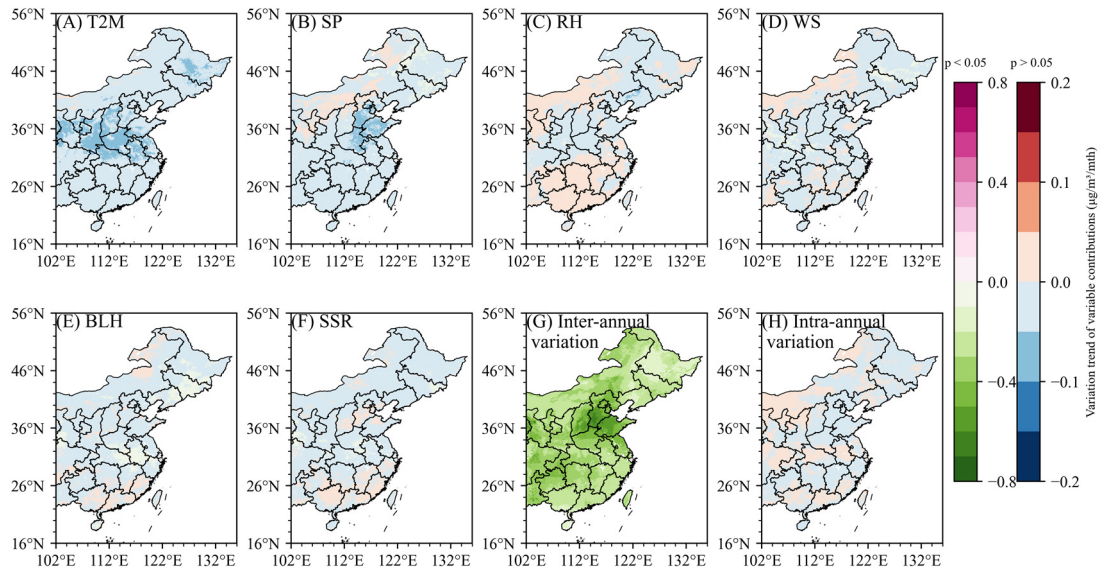

**Figure S8. Trends in the SHAP values of various variables for PM10.**

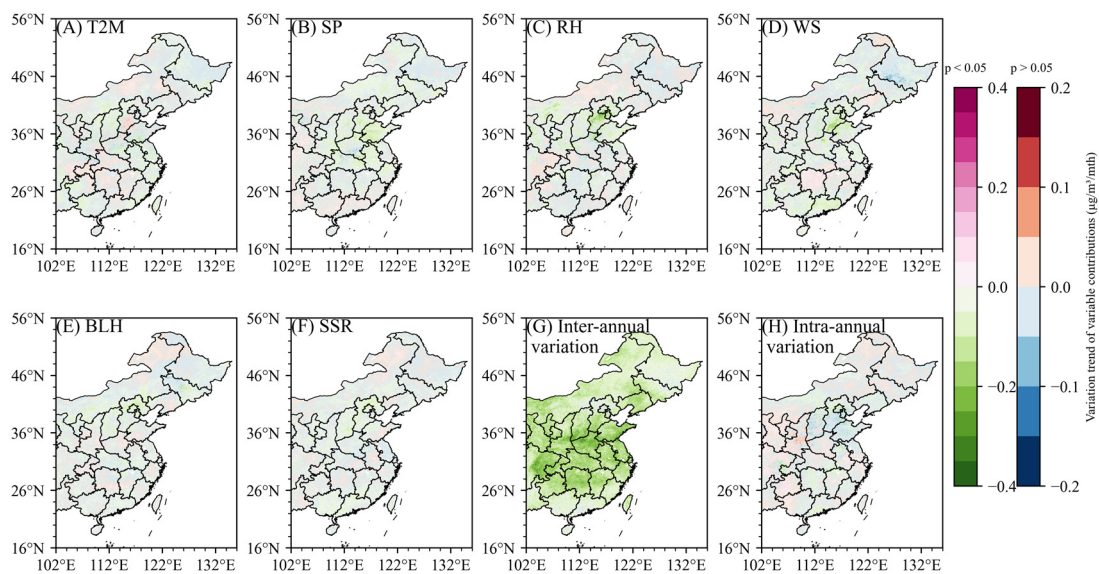

**Figure S9. Trends in the relative contributions of various variables to PM2.5.**

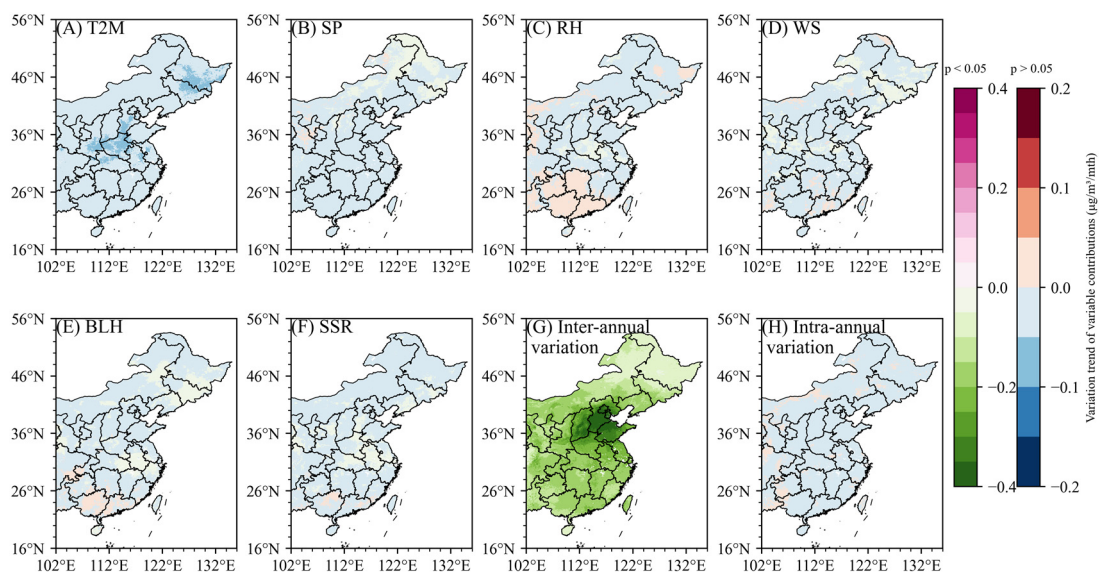

**Figure S10. Trends in the SHAP values of various variables for PM2.5.**
